# Supplementary material
Source: Springer Nature journal article supplement (https://www.springermedizin.de/resource/supplementary/12885_2007_981_MOESM4_ESM.pdf/9471822)
Supplement: MOESM4 [file 9471822]

**Additional Table 4 Relationships between cytoplasmic and nuclear protein**

| Protein                 | Combined cell types |         | PDAC        |                  | Ductal epithelia adjacent to PDAC |              | Duct cell in non-PDAC specimen |         |
|-------------------------|---------------------|---------|-------------|------------------|-----------------------------------|--------------|--------------------------------|---------|
|                         | $\rho$              | p-value | $\rho$      | p-value          | $\rho$                            | p-value      | $\rho$                         | p-value |
| <sup>S727</sup> p-STAT3 | 0.02                | 0.91    | -0.22       | 0.29             | 0.10                              | 0.73         | 0.35                           | 0.087   |
| $\beta$ CAT             | 0.21                | 0.13    | 0.09        | 0.67             | -                                 | -            | -                              | -       |
| <sup>Y705</sup> STAT3   | 0.37                | 0.008   | 0.22        | 0.28             | 0.19                              | 0.53         | 0.43                           | 0.031   |
| p- $\beta$ CAT          | 0.07                | 0.62    | 0.25        | 0.21             | -0.05                             | 0.86         | 0.05                           | 0.81    |
| p-GSK3 $\beta$          | 0.19                | 0.18    | 0.28        | 0.17             | 0.02                              | 0.94         | 0.08                           | 0.72    |
| <sup>S473</sup> p-PKB   | 0.43                | 0.002   | 0.32        | 0.11             | 0.49                              | 0.088        | 0.37                           | 0.071   |
| PKB $\beta$             | 0.39                | 0.005   | 0.36        | 0.072            | 0.40                              | 0.20         | 0.35                           | 0.094   |
| p-JNK                   | 0.37                | 0.009   | 0.43        | 0.029            | 0.03                              | 0.92         | -0.05                          | 0.83    |
| p-NF $\kappa$ B         | 0.41                | 0.004   | 0.44        | 0.029            | 0.41                              | 0.18         | 0.41                           | 0.044   |
| <sup>T308</sup> p-PKB   | 0.51                | <0.001  | <b>0.52</b> | <b>0.007</b>     | -0.24                             | 0.48         | 0.24                           | 0.27    |
| <b>p-p38</b>            | 0.63                | <0.001  | <b>0.56</b> | <b>0.004</b>     | <b>0.61</b>                       | <b>0.036</b> | 0.44                           | 0.030   |
| <b>SMAD4</b>            | 0.27                | 0.06    | <b>0.63</b> | <b>&lt;0.001</b> | 0.00                              | 1.00         | 0.22                           | 0.31    |
| <b>p-ERK</b>            | 0.72                | <0.001  | <b>0.72</b> | <b>&lt;0.001</b> | 0.29                              | 0.34         | 0.42                           | 0.035   |
| <b>PTEN</b>             | 0.56                | <0.001  | <b>0.87</b> | <b>&lt;0.001</b> | 0.23                              | 0.46         | 0.17                           | 0.43    |

Significant moderate to strong relationships are highlighted ( $\rho \geq 0.5$ ,  $p \leq 0.05$ ). Identical protein values between the sub-cellular compartments were omitted from the Spearman's test (—).
